# Supplementary material for: Sulfur quantum dots wrapped by conductive polymer shell with internal void spaces for high-performance lithium–sulfur batteries
Source: Royal Society of Chemistry journal article supplement (doi:10.1039/c4ta06609j), 2015-01-01
Supplement: c4ta06609j1.pdf [file c4ta06609j1.pdf]

## Supporting Information

### Sulfur Quantum Dots Wrapped by Conductive Polymer Shell with Internal Void Spaces for High-Performance Lithium-Sulfur Batteries

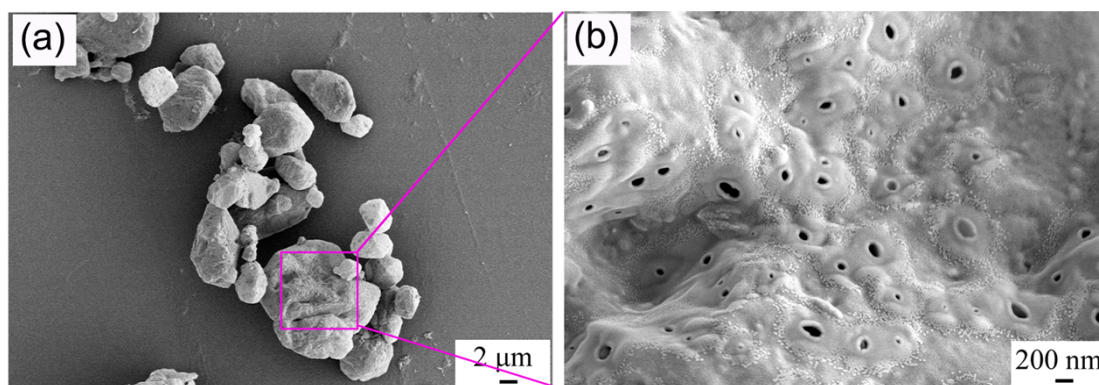

Fig. S1. SEM images of S treated with CS<sub>2</sub>. Elemental sulfur was directly dissolved in CS<sub>2</sub> and magnetic stirred at 40 °C, plenty of nanopores and nanoparticles (b) formed and precipitated on the surface of large sulfur particles (a) as the CS<sub>2</sub> solvent vaped out.

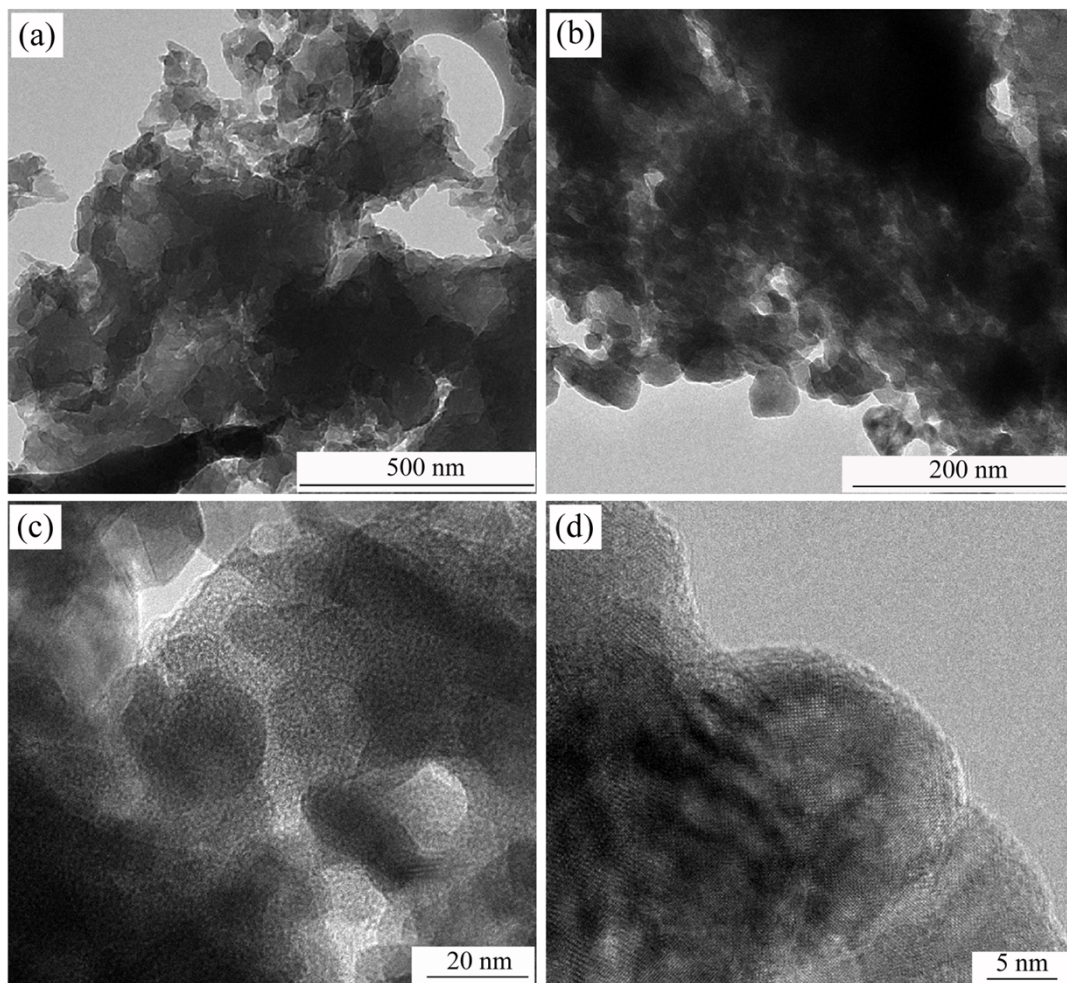

Fig. S2. TEM images of the S/PVK composites.

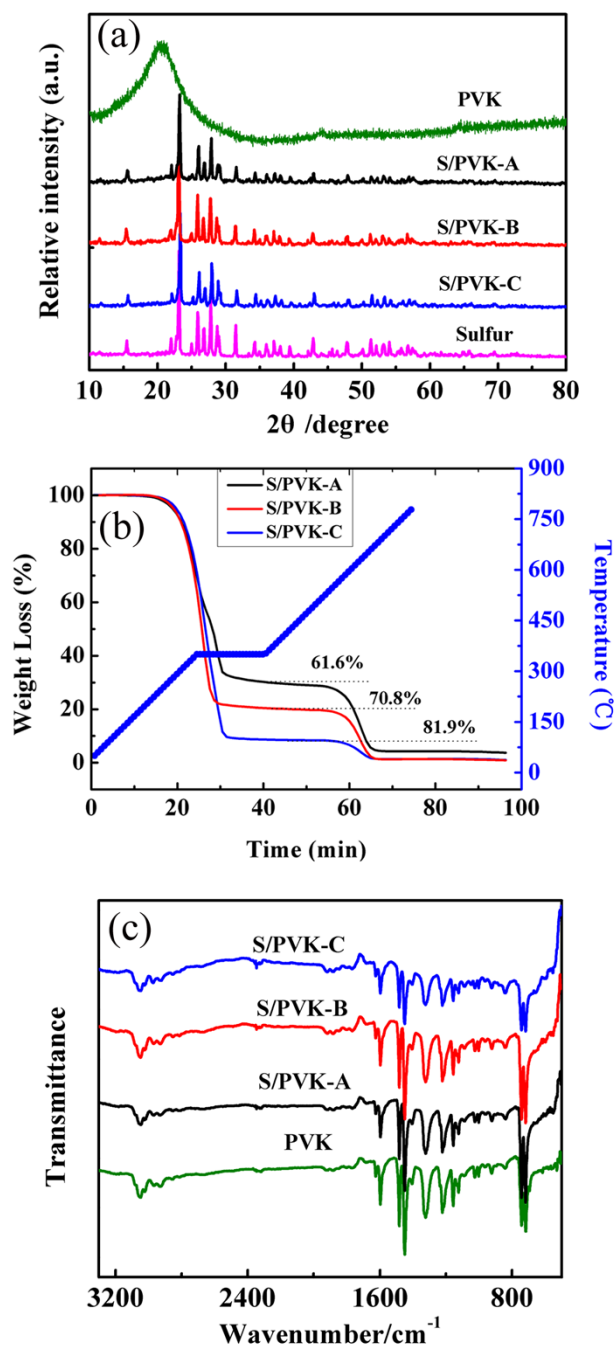

Fig. S3. (a) XRD patterns of S/PVK nanocomposites with different S content. (b) Thermal gravimetric analysis (TGA) of S/PVK nanocomposites. (c) FT-IR spectra of S/PVK-A, B and C. The TGA measurements of S/PVK and SQD/PVK composites were measured in a two-stage heating procedure under nitrogen flow which were first heated in the range of 50-350 °C at a heating rate of 10 °C/min, and then maintained at this temperature for 20 minutes before heating to 800 °C with the same heating rate. TGA measurement of pure PVK was measured from 50-800°C at a heating rate of 10 °C/min.

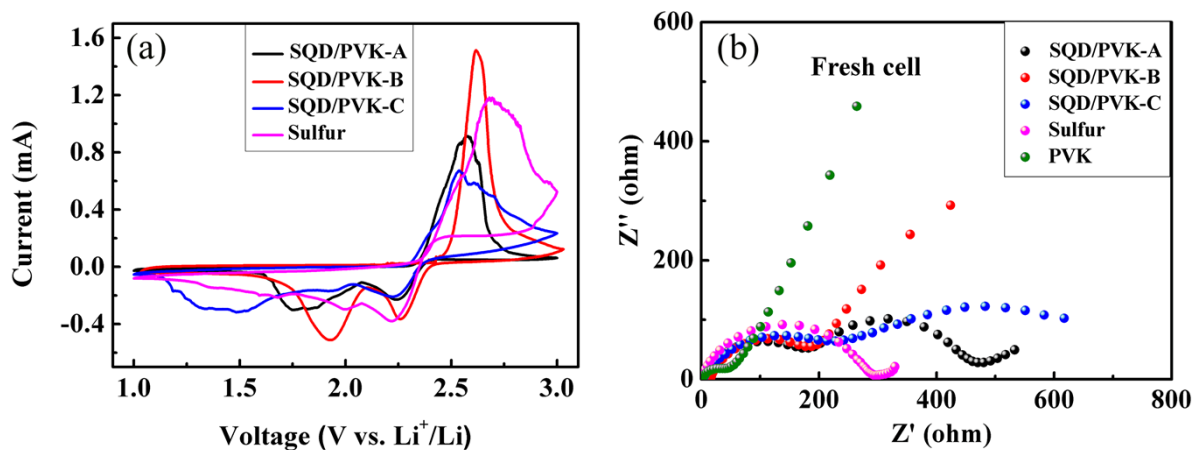

Fig. S4. (a) Cyclic voltammograms of sulfur and the SQD/PVK composite electrode at  $0.05 \text{ mV s}^{-1}$  at 1.0 to 3.0 V vs.  $\text{Li}/\text{Li}^+$ . (b) Nyquist plots of the electrode for the different SQD/PVK nanocomposites, pure PVK and pure sulfur cathode before cycling from 200 kHz to 100 mHz at room temperature.

*Table S1 A Comparison of the Electrochemical Performance of Conducting Polymer/S Composites from Literatures*

| sample                       | sulfur content<br>(wt%) | cycling performance |               |            |                    | Ref.             |
|------------------------------|-------------------------|---------------------|---------------|------------|--------------------|------------------|
|                              |                         | current             | reversible DC | cycles     | capacity retention |                  |
| <sup>b</sup> PANI/S          | 62                      | 1 C                 | 432           | 500        | 76%                | 22               |
| <sup>c</sup> PTh/S           | 71.9                    | 0.0625 C            | 830.2         | 80         | 74.2%              | 21               |
| <sup>d</sup> PPy/S           | 77                      | 0.5 C               | 726           | 500        | 60%                | 24               |
| <sup>e</sup> PEDOT/S         | 72                      | 0.25 C              | 930           | 50         | 83%                | 25               |
| PANI/S                       | 82                      | 0.5 C               | 628           | 200        | 68.3%              | 23               |
| <sup>f</sup> PEDOT:<br>PSS/S | unknown                 | 0.2 C               | 600           | 150        | 52.6%              | 33               |
| <b>S/PVK</b>                 | <b>70.8</b>             | <b>0.5 C</b>        | <b>687.7</b>  | <b>200</b> | <b>89.7%</b>       | <b>this work</b> |
|                              |                         | <b>0.5 C</b>        | <b>488.6</b>  | <b>600</b> | <b>63.8%</b>       | <b>this work</b> |
|                              |                         | <b>0.75 C</b>       | <b>656.5</b>  | <b>80</b>  | <b>92.1%</b>       | <b>this work</b> |
|                              |                         | <b>0.75 C</b>       | <b>608.4</b>  | <b>150</b> | <b>85.4%</b>       | <b>this work</b> |

1 C=1672~1680 mA g<sup>-1</sup>, DC<sup>a</sup> is the discharge specific capacity/mAh g<sup>-1</sup>, <sup>b</sup>PANI is the abbreviation of polyaniline, <sup>c</sup>PTh is polythiophene, <sup>d</sup>PPy is polypyrrole, <sup>e</sup>PEDOT is poly(3,4-ethylenedioxythiophene), and <sup>f</sup>PEDOT:PSS is poly(3,4-ethylenedioxythiophene)-poly(styrene sulfonate)

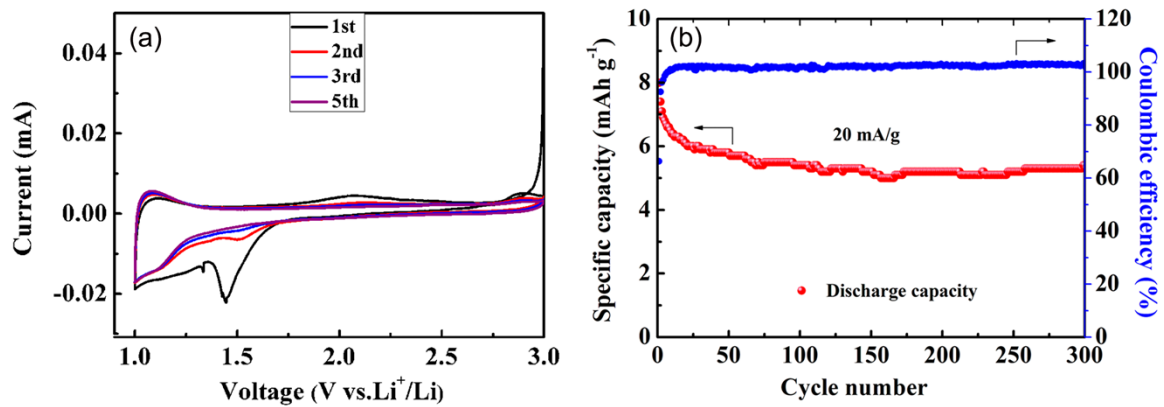

Figure S5. (a) CV curves of the pure PVK electrode at a scan rate of  $0.05 \text{ mV s}^{-1}$ . (b) Cycling performance of pure PVK electrode at a current density of  $20 \text{ mA g}^{-1}$ .

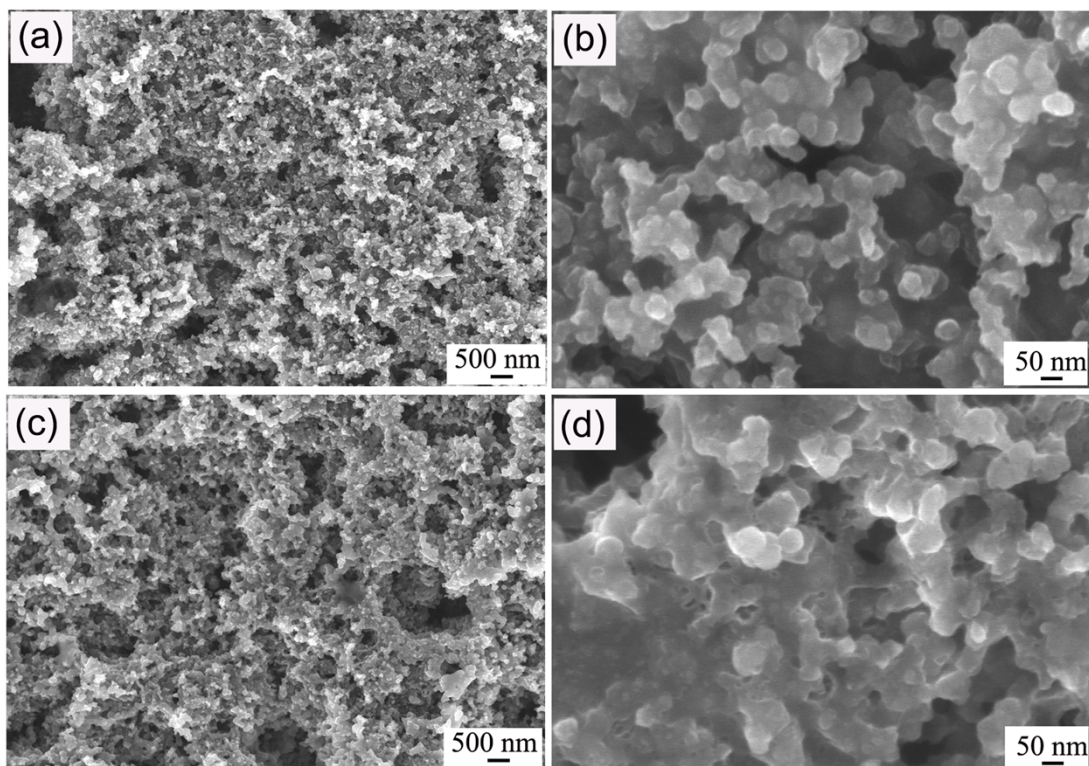

Figure S6. SEM images of the SQD/PVK-B electrode before cycling (a and b), and after 500 cycles (c and d).
